# Supplementary material for: Specific Hsp100 Chaperones Determine the Fate of the First Enzyme of the Plastidial Isoprenoid Pathway for Either Refolding or Degradation by the Stromal Clp Protease in Arabidopsis
Source: PubMed Central journal article supplement (PMC4729485; doi:10.1371/journal.pgen.1005824), 2016-01-27
Supplement: pgen.1005824.s001.pdf [file pgen.1005824.s001.pdf]

## Bacteria

misfolded/aggregated  
protein substrate

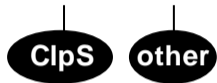

ClpA/C/E/X

ClpP

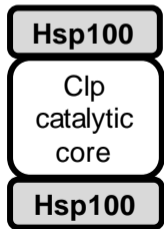

## Plastids

misfolded/aggregated  
protein substrate

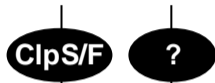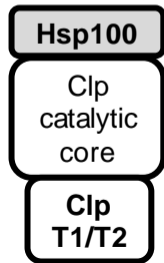

ClpC1/C2/D

ClpP1/P3-P6  
ClpR1-R4
