# Supplementary material for: Specific Hsp100 Chaperones Determine the Fate of the First Enzyme of the Plastidial Isoprenoid Pathway for Either Refolding or Degradation by the Stromal Clp Protease in Arabidopsis
Source: PubMed Central journal article supplement (PMC4729485; doi:10.1371/journal.pgen.1005824), 2016-01-27

WT

*clpc1-1**clpc1-2**clpc2-1**clpc2-2* $\alpha$ DXS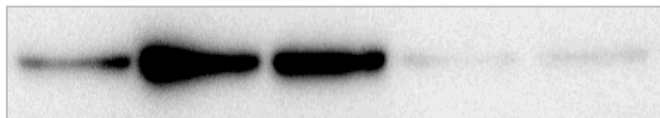 $\alpha$  Hsp70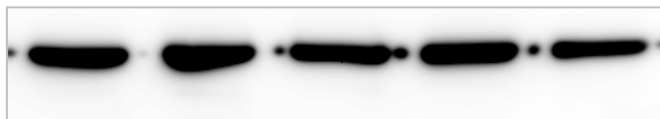 $\alpha$  ClpC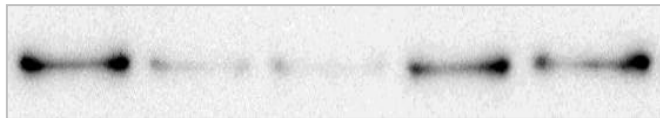 $\alpha$  ClpB3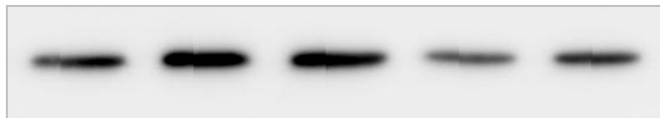

LC

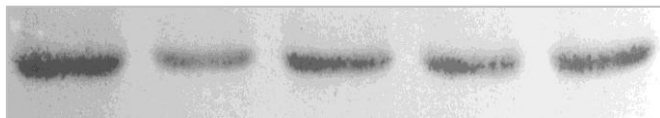

Supplement: pgen.1005824.s002.pdf [file pgen.1005824.s002.pdf]
