# Supplementary material for: Specific Hsp100 Chaperones Determine the Fate of the First Enzyme of the Plastidial Isoprenoid Pathway for Either Refolding or Degradation by the Stromal Clp Protease in Arabidopsis
Source: PubMed Central journal article supplement (PMC4729485; doi:10.1371/journal.pgen.1005824), 2016-01-27

**A***35S:DXS-GFP*

WT

*j20*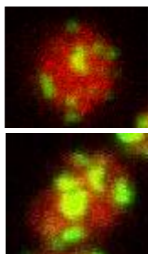**B**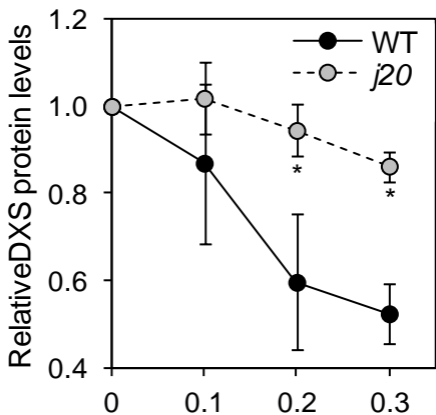

WT

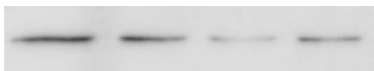*j20*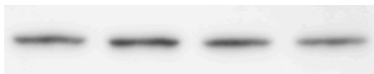

Supplement: pgen.1005824.s004.pdf [file pgen.1005824.s004.pdf]
