# Supplementary material for: Specific Hsp100 Chaperones Determine the Fate of the First Enzyme of the Plastidial Isoprenoid Pathway for Either Refolding or Degradation by the Stromal Clp Protease in Arabidopsis
Source: PubMed Central journal article supplement (PMC4729485; doi:10.1371/journal.pgen.1005824), 2016-01-27

CLM concentration ( $\mu\text{M}$ )

0

2

4

WT

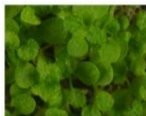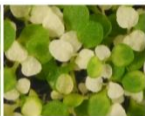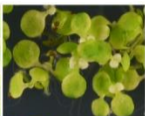

*j20*

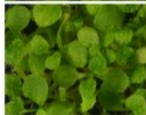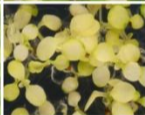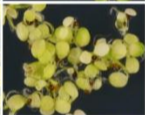

*clpc1*

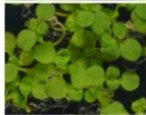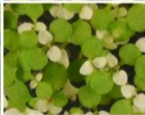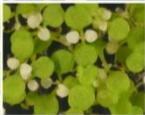

*j20*  
*clpc1*

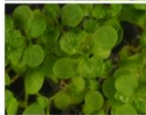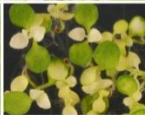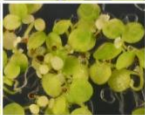

Supplement: pgen.1005824.s006.pdf [file pgen.1005824.s006.pdf]
