# Supplementary material for: Specific Hsp100 Chaperones Determine the Fate of the First Enzyme of the Plastidial Isoprenoid Pathway for Either Refolding or Degradation by the Stromal Clp Protease in Arabidopsis
Source: PubMed Central journal article supplement (PMC4729485; doi:10.1371/journal.pgen.1005824), 2016-01-27

**A**Log<sub>2</sub> ratio  
(*ClpC1*/*ClpB3*)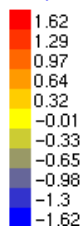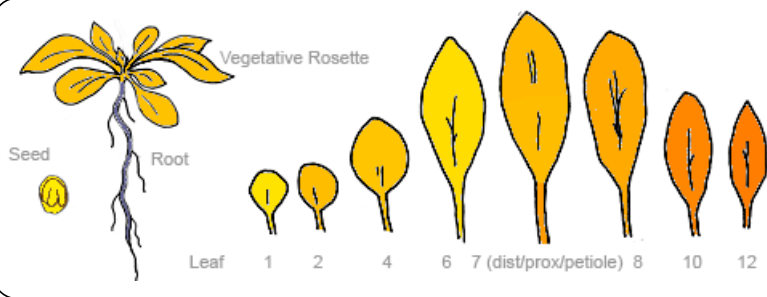**B****Cold** (continuous 4°C on crushed ice in cold chamber)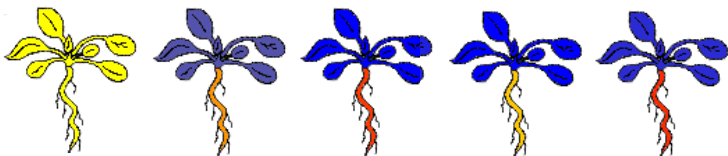**Salt** (150mM NaCl)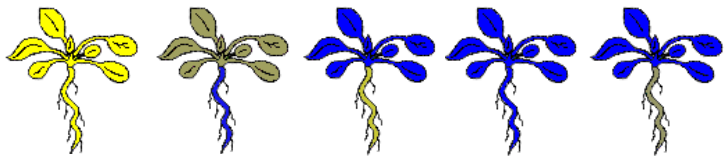**UV-B** (15 minutes UV-B light)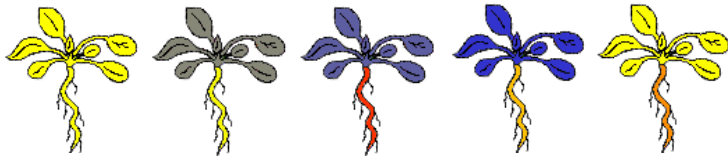**Oxidative** (10 μM Methyl viologen)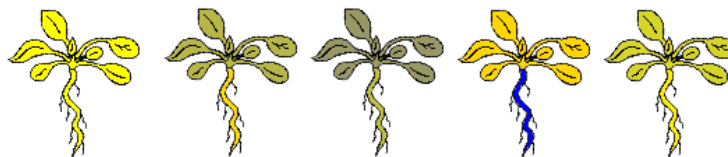

⌚ 0 Hour

1 Hour

3 Hours

6 Hours

12 Hours

Log<sub>2</sub> ratio  
(*ClpC1*/*ClpB3*)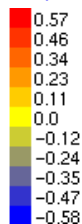

Supplement: pgen.1005824.s007.pdf [file pgen.1005824.s007.pdf]
