# Supplementary material for: Specific Hsp100 Chaperones Determine the Fate of the First Enzyme of the Plastidial Isoprenoid Pathway for Either Refolding or Degradation by the Stromal Clp Protease in Arabidopsis
Source: PubMed Central journal article supplement (PMC4729485; doi:10.1371/journal.pgen.1005824), 2016-01-27

Time (h)

0

3

6

9

12

100 $\mu$ M  
cycloheximide

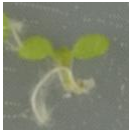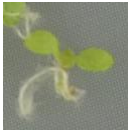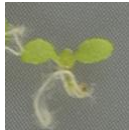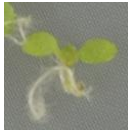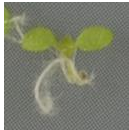

Supplement: pgen.1005824.s008.pdf [file pgen.1005824.s008.pdf]
